# Supplementary material
Source: Springer Nature journal article supplement (https://www.springermedizin.de/resource/supplementary/12865_2006_110_MOESM3_ESM.pdf/9428530)

HIV-1 gp120  
control

#1

#2

#3

#4

#5

#6

#7

~120 kd—

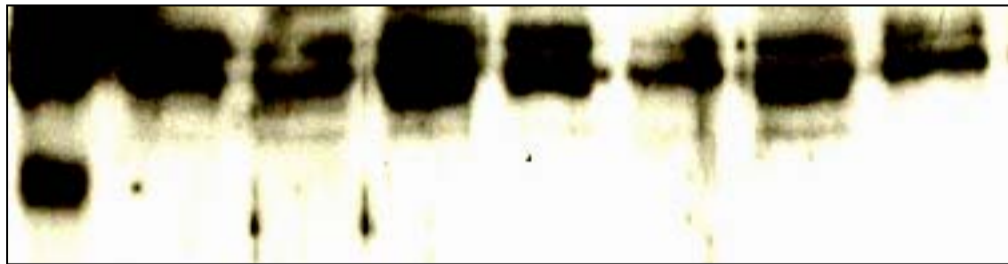

Supplement: MOESM3 [file 9428530]
